# Supplementary material
Source: publisher site journal article supplement (https://www.dovepress.com/article/329569)
Supplement: Supplementary file 1 [file get_supplementary_file.php]

| Strain ID | Isolation site   | Gender | Age | Localization of lesions | Clinical diagnosis | Sequencing technology | Q20 (%) | Q30 (%) | GC content (%) | Sequencing depth | Total number of SNPs |
|-----------|------------------|--------|-----|-------------------------|--------------------|-----------------------|---------|---------|----------------|------------------|----------------------|
| F0572     | Chengmai, Hainan | Female | 30  | Arm                     | Tinea corporis     | Illumina HiSeq X      | 96.44   | 90.36   | 43.82          | 101              | 14747                |
| F0616     | Fuyang, Anhui    | Female | 25  | Ankle                   | Tinea pedis        | Illumina HiSeq X      | 96.63   | 90.4    | 45.52          | 118              | 15332                |
| F0796     | Chengmai, Hainan | Male   | 48  | Inner thigh             | Tinea cruris       | Illumina HiSeq X      | 96.43   | 89.5    | 43.73          | 111              | 15547                |
| F0854     | Wenchang, Hainan | Male   | 53  | Groin                   | Tinea cruris       | Illumina HiSeq X      | 97.23   | 90.72   | 43.41          | 88               | 15181                |
| F0855     | Lingshui, Hainan | Male   | 14  | Foot                    | Tinea pedis        | Illumina HiSeq X      | 97.31   | 90.53   | 45.59          | 128              | 15803                |
| F0884     | Ledong, Hainan   | Male   | 34  | Abdomen                 | Tinea cruris       | Illumina HiSeq X      | 97.25   | 89.77   | 42.48          | 100              | 15523                |
| F0976     | Fuyang, Anhui    | Male   | 32  | Between left toe        | Tinea pedis        | Illumina HiSeq X      | 96.62   | 89.79   | 42.64          | 86               | 15380                |
| F1050     | Lingshui, Hainan | Female | 23  | Abdomen                 | Tinea corporis     | Illumina HiSeq X      | 96.89   | 90.37   | 43.54          | 102              | 15450                |
| F1064     | Wenchang, Hainan | Female | 44  | Buttock                 | Tinea cruris       | Illumina HiSeq X      | 96.31   | 90.22   | 42.09          | 73               | 15570                |
| F1069     | Wenchang, Hainan | Female | 25  | Buttock                 | Tinea cruris       | Illumina HiSeq X      | 96.43   | 90.31   | 42.5           | 125              | 15624                |
| F1122     | Wenchang, Hainan | Female | 35  | Abdomen                 | Tinea corporis     | Illumina HiSeq X      | 97.12   | 89.97   | 42.9           | 90               | 15285                |
| F1125     | Wenchang, Hainan | Female | 53  | Groin                   | Tinea cruris       | Illumina HiSeq X      | 97.13   | 89.84   | 44.16          | 121              | 15469                |
| F1134     | Wenchang, Hainan | Male   | 21  | Buttock                 | Tinea cruris       | Illumina HiSeq X      | 97.11   | 90.15   | 43.38          | 70               | 15783                |
| F1159     | Wenchang, Hainan | Male   | 59  | Groin                   | Tinea cruris       | Illumina HiSeq X      | 96.32   | 90.05   | 44.98          | 124              | 15612                |
| F1180     | Chengmai, Hainan | Male   | 48  | Left calf               | Tinea corporis     | Illumina HiSeq X      | 96.46   | 90.28   | 44.42          | 146              | 15606                |
| F1188     | Wenchang, Hainan | Male   | 76  | Back of thigh           | Tinea cruris       | Illumina HiSeq X      | 97.49   | 89.77   | 41.73          | 79               | 15610                |
| F1209     | Shiyan, Hubei    | Female | 42  | Hand                    | Tinea mannum       | Illumina HiSeq X      | 96.5    | 90.06   | 43.84          | 113              | 15256                |
| F1210     | Shiyan, Hubei    | Female | 37  | Back of the hand        | Tinea mannum       | Illumina HiSeq X      | 97.27   | 89.59   | 44.79          | 91               | 15387                |
| F1216     | Fuyang, Anhui    | Female | 24  | Groin                   | Tinea cruris       | Illumina HiSeq X      | 96.2    | 89.69   | 44.34          | 108              | 15321                |
| F1218     | Fuyang, Anhui    | Male   | 40  | Left sole               | Tinea pedis        | Illumina HiSeq X      | 96.67   | 89.91   | 44.4           | 86               | 15477                |
| F1225     | Shiyan, Hubei    | Female | 23  | Groin                   | Tinea cruris       | Illumina HiSeq X      | 97.45   | 90.07   | 45.59          | 128              | 15577                |
| F1227     | Fuyang, Anhui    | Female | 55  | Buttock                 | Tinea cruris       | Illumina HiSeq X      | 96.69   | 89.48   | 45.19          | 132              | 15316                |
| F1250     | Lingshui, Hainan | Male   | 18  | Thigh                   | Tinea corporis     | Illumina HiSeq X      | 97.08   | 89.53   | 43.44          | 113              | 15739                |
| F1262     | Luzhou, Sichuan  | Female | 60  | Face                    | Tinea corporis     | Illumina HiSeq X      | 97.01   | 90.28   | 45.55          | 123              | 15117                |
| F1270     | Fuyang, Anhui    | Male   | 38  | Behind the ear          | Tinea corporis     | Illumina HiSeq X      | 96.35   | 90.25   | 45.14          | 126              | 15614                |
| F1278     | Lingshui, Hainan | Male   | 48  | Between toes            | Tinea pedis        | Illumina HiSeq X      | 97.14   | 90.03   | 45.67          | 135              | 15119                |
| F1284     | Wenchang, Hainan | Male   | 24  | Foot                    | Tinea pedis        | Illumina HiSeq X      | 97.33   | 90.12   | 43.75          | 137              | 15788                |
| F1310     | Lingshui, Hainan | Female | 27  | Sole                    | Tinea pedis        | Illumina HiSeq X      | 97.41   | 89.92   | 45.11          | 133              | 15593                |
| F1312     | Luzhou, Sichuan  | Female | 32  | Toenail                 | Onychomycosis      | Illumina HiSeq X      | 97.14   | 90.87   | 46.5           | 114              | 15458                |
| F1314     | Fuyang, Anhui    | Male   | 56  | Buttock                 | Tinea cruris       | Illumina HiSeq X      | 96.33   | 90      | 44.61          | 131              | 15392                |
| F1316     | Shiyan, Hubei    | Male   | 41  | Groin                   | Tinea cruris       | Illumina HiSeq X      | 97.36   | 89.64   | 41.92          | 96               | 15451                |
| F1317     | Wenchang, Hainan | Female | 68  | Chest                   | Tinea corporis     | Illumina HiSeq X      | 96.84   | 90.46   | 45.33          | 133              | 15807                |
| F1320     | Shiyan, Hubei    | Male   | 42  | Abdomen                 | Tinea corporis     | Illumina HiSeq X      | 97.22   | 89.91   | 46.15          | 126              | 15622                |
| F1321     | Chengmai, Hainan | Female | 50  | Groin                   | Tinea cruris       | Illumina HiSeq X      | 95.69   | 89.97   | 44.38          | 124              | 15506                |
| F1325     | Wenchang, Hainan | Male   | 12  | Groin                   | Tinea cruris       | Illumina HiSeq X      | 97.54   | 89.97   | 43.8           | 116              | 15609                |
| F1336     | Shiyan, Hubei    | Female | 21  | Hand                    | Tinea mannum       | Illumina HiSeq X      | 96.66   | 88.3    | 45.25          | 127              | 15778                |
| F1338     | Chengmai, Hainan | Female | 41  | Back                    | Tinea corporis     | Illumina HiSeq X      | 96.41   | 89.92   | 43.47          | 120              | 15565                |

|       |                  |        |    |               |                |                  |       |       |       |     |       |
|-------|------------------|--------|----|---------------|----------------|------------------|-------|-------|-------|-----|-------|
| F1341 | Chengmai, Hainan | Male   | 29 | Inner thigh   | Tinea cruris   | Illumina HiSeq X | 96.57 | 90.24 | 42.86 | 140 | 15692 |
| F1345 | Wenchang, Hainan | Female | 54 | Buttock       | Tinea cruris   | Illumina HiSeq X | 96.85 | 90.25 | 44.28 | 121 | 15549 |
| F1346 | Haikou, Hainan   | Male   | 44 | Buttock       | Tinea cruris   | Illumina HiSeq X | 97.24 | 93.18 | 44.51 | 140 | 15158 |
| F1348 | Haikou, Hainan   | Male   | 30 | Buttock       | Tinea cruris   | Illumina HiSeq X | 97.27 | 93.17 | 44.41 | 144 | 15356 |
| F1351 | Wenchang, Hainan | Male   | 27 | Buttock       | Tinea cruris   | Illumina HiSeq X | 97.47 | 92.85 | 46.25 | 161 | 13094 |
| F1354 | Shiyan, Hubei    | Male   | 52 | Groin         | Tinea cruris   | Illumina HiSeq X | 96.98 | 90.14 | 46.22 | 136 | 15326 |
| F1356 | Shiyan, Hubei    | Female | 36 | Buttock       | Tinea cruris   | Illumina HiSeq X | 96.78 | 90.31 | 45.29 | 116 | 15350 |
| F1365 | Haikou, Hainan   | Male   | 21 | Buttock       | Tinea cruris   | Illumina HiSeq X | 96.99 | 92.88 | 43.07 | 140 | 15580 |
| F1369 | Shiyan, Hubei    | Male   | 22 | Lower abdomen | Tinea corporis | Illumina HiSeq X | 96.98 | 92.5  | 44.07 | 157 | 15206 |
| F1372 | Shiyan, Hubei    | Male   | 42 | Abdomen       | Tinea corporis | Illumina HiSeq X | 96.83 | 92.93 | 44.89 | 148 | 15008 |
| F1378 | Haikou, Hainan   | Male   | 18 | Groin         | Tinea cruris   | Illumina HiSeq X | 96.49 | 93.67 | 45.3  | 126 | 14795 |
| F1381 | Wenchang, Hainan | Female | 64 | Abdomen       | Tinea corporis | Illumina HiSeq X | 97.58 | 92.97 | 44.07 | 169 | 15660 |
| F1385 | Haikou, Hainan   | Male   | 21 | Groin         | Tinea cruris   | Illumina HiSeq X | 96.59 | 90.13 | 45.92 | 117 | 15880 |
| F1386 | Haikou, Hainan   | Male   | 18 | Buttock       | Tinea cruris   | Illumina HiSeq X | 97.11 | 89.94 | 45.84 | 116 | 15482 |
| F1389 | Wenchang, Hainan | Male   | 34 | Buttock       | Tinea cruris   | Illumina HiSeq X | 97.58 | 93.29 | 45.95 | 161 | 13946 |
| F1391 | Haikou, Hainan   | Male   | 13 | Groin         | Tinea cruris   | Illumina HiSeq X | 96.96 | 89.91 | 46.06 | 116 | 15243 |
| F1392 | Luzhou, Sichuan  | Male   | 16 | Groin         | Tinea cruris   | Illumina HiSeq X | 97.16 | 90.33 | 46.08 | 123 | 15618 |
| F1398 | Shiyan, Hubei    | Male   | 32 | Groin         | Tinea cruris   | Illumina HiSeq X | 96.57 | 93.59 | 44.95 | 139 | 15346 |
| F1400 | Shiyan, Hubei    | Female | 21 | Groin         | Tinea cruris   | Illumina HiSeq X | 97.01 | 93.36 | 43.95 | 149 | 15463 |
| F1401 | Shiyan, Hubei    | Female | 21 | Groin         | Tinea cruris   | Illumina HiSeq X | 97.05 | 93.49 | 44.9  | 171 | 15585 |
| F1403 | Shiyan, Hubei    | Female | 25 | Abdomen       | Tinea corporis | Illumina HiSeq X | 96.72 | 93.17 | 45.01 | 168 | 14721 |
| F1405 | Ledong, Hainan   | Male   | 30 | Abdomen       | Tinea cruris   | Illumina HiSeq X | 97.28 | 92.76 | 44.38 | 155 | 15473 |
| F1407 | Wenchang, Hainan | Male   | 50 | Buttock       | Tinea cruris   | Illumina HiSeq X | 97.58 | 92.65 | 45.25 | 143 | 14548 |
| F1409 | Lingshui, Hainan | Male   | 60 | Groin         | Tinea cruris   | Illumina HiSeq X | 97.48 | 93.25 | 44.93 | 157 | 14302 |
| F1411 | Ledong, Hainan   | Female | 57 | Knee joint    | Tinea corporis | Illumina HiSeq X | 97.16 | 92.18 | 44    | 135 | 14940 |
| F1414 | Haikou, Hainan   | Male   | 31 | Buttock       | Tinea cruris   | Illumina HiSeq X | 97.04 | 90.03 | 46.79 | 123 | 14494 |
| F1417 | Shiyan, Hubei    | Male   | 23 | Fingernail    | Onychomycosis  | Illumina HiSeq X | 97.14 | 93.16 | 44.45 | 114 | 14924 |
| F1421 | Wenchang, Hainan | Female | 33 | Buttock       | Tinea cruris   | Illumina HiSeq X | 96.48 | 92.84 | 44.93 | 140 | 15001 |
| F1425 | Haikou, Hainan   | Male   | 20 | Groin         | Tinea cruris   | Illumina HiSeq X | 97.47 | 92.54 | 45.33 | 151 | 14387 |
| F1431 | Haikou, Hainan   | Male   | 56 | Groin         | Tinea cruris   | Illumina HiSeq X | 97.17 | 92.51 | 44.21 | 162 | 15276 |
| F1432 | Haikou, Hainan   | Male   | 46 | Buttock       | Tinea cruris   | Illumina HiSeq X | 96.48 | 93.41 | 46.31 | 152 | 14169 |
| F1434 | Haikou, Hainan   | Male   | 17 | Groin         | Tinea cruris   | Illumina HiSeq X | 96.4  | 92.1  | 44.9  | 141 | 15030 |
| F1436 | Wenchang, Hainan | Male   | 21 | Foot          | Tinea pedis    | Illumina HiSeq X | 97.52 | 93.2  | 44.04 | 139 | 15628 |
| F1440 | Fuyang, Anhui    | Female | 48 | Groin         | Tinea cruris   | Illumina HiSeq X | 96.52 | 93.12 | 44.99 | 128 | 15132 |
| F1442 | Haikou, Hainan   | Male   | 18 | Groin         | Tinea cruris   | Illumina HiSeq X | 97.23 | 93.03 | 46.46 | 152 | 12081 |
| F1446 | Chengmai, Hainan | Male   | 42 | Back          | Tinea corporis | Illumina HiSeq X | 96.56 | 93.28 | 44.56 | 162 | 15904 |
| F1448 | Haikou, Hainan   | Male   | 21 | Thigh         | Tinea corporis | Illumina HiSeq X | 96.38 | 92.86 | 44.86 | 151 | 15476 |
| F1450 | Haikou, Hainan   | Male   | 34 | Groin         | Tinea cruris   | Illumina HiSeq X | 96.59 | 93    | 43.85 | 139 | 15637 |

|       |                  |        |    |                  |                |                  |       |       |       |     |       |
|-------|------------------|--------|----|------------------|----------------|------------------|-------|-------|-------|-----|-------|
| F1452 | Shiyan, Hubei    | Male   | 38 | Back             | Tinea corporis | Illumina HiSeq X | 97.12 | 93.06 | 44.37 | 155 | 15373 |
| F1454 | Fuyang, Anhui    | Male   | 25 | Left inner thigh | Tinea cruris   | Illumina HiSeq X | 96.61 | 93.28 | 45.25 | 151 | 14819 |
| F1456 | Fuyang, Anhui    | Male   | 16 | Groin            | Tinea cruris   | Illumina HiSeq X | 96.42 | 92.6  | 44.89 | 141 | 14736 |
| F1458 | Shiyan, Hubei    | Male   | 27 | Groin            | Tinea cruris   | Illumina HiSeq X | 96.99 | 92.84 | 43.59 | 109 | 15455 |
| F1460 | Shiyan, Hubei    | Male   | 31 | Groin            | Tinea cruris   | Illumina HiSeq X | 96.73 | 93.13 | 44.32 | 140 | 15428 |
| F1464 | Shiyan, Hubei    | Male   | 20 | Groin            | Tinea cruris   | Illumina HiSeq X | 97.38 | 93.47 | 44.01 | 129 | 15536 |
| F1468 | Shiyan, Hubei    | Male   | 18 | Groin            | Tinea cruris   | Illumina HiSeq X | 95.89 | 93.63 | 43.54 | 115 | 14800 |
| F1470 | Fuyang, Anhui    | Male   | 40 | Face             | Tinea faciei   | Illumina HiSeq X | 96.35 | 92.76 | 44.09 | 135 | 15207 |
| F1483 | Shiyan, Hubei    | Female | 20 | Buttock          | Tinea cruris   | Illumina HiSeq X | 97.3  | 92.94 | 43.79 | 169 | 15093 |
| F1484 | Shiyan, Hubei    | Male   | 20 | Groin            | Tinea cruris   | Illumina HiSeq X | 96.91 | 92.73 | 44.16 | 142 | 15643 |
| F1490 | Haikou, Hainan   | Male   | 22 | Buttock          | Tinea cruris   | Illumina HiSeq X | 97.48 | 90.33 | 43.63 | 107 | 15425 |
| F1494 | Fuyang, Anhui    | Male   | 58 | Front chest      | Tinea corporis | Illumina HiSeq X | 96.44 | 90.29 | 43.99 | 129 | 15502 |
| F1500 | Haikou, Hainan   | Male   | 39 | Thigh            | Tinea corporis | Illumina HiSeq X | 97.28 | 89.9  | 41.92 | 100 | 15358 |
| F1502 | Haikou, Hainan   | Female | 52 | Buttock          | Tinea cruris   | Illumina HiSeq X | 97.36 | 92.65 | 44.55 | 131 | 15341 |
| F1504 | Haikou, Hainan   | Male   | 21 | Back             | Tinea corporis | Illumina HiSeq X | 97.13 | 93.15 | 47.15 | 173 | 12786 |
| F1506 | Haikou, Hainan   | Female | 52 | Buttock          | Tinea cruris   | Illumina HiSeq X | 97    | 89.93 | 43.38 | 118 | 15506 |
| F1511 | Wenchang, Hainan | Male   | 41 | Groin            | Tinea cruris   | Illumina HiSeq X | 97.45 | 90.18 | 44.63 | 134 | 15540 |
| F1512 | Wenchang, Hainan | Male   | 63 | Armpit           | Tinea corporis | Illumina HiSeq X | 97.5  | 89.86 | 41.94 | 91  | 15470 |
| F1513 | Wenchang, Hainan | Male   | 63 | Armpit           | Tinea corporis | Illumina HiSeq X | 97.53 | 90.02 | 39.39 | 75  | 15586 |
| F1518 | Shiyan, Hubei    | Male   | 36 | Groin            | Tinea cruris   | Illumina HiSeq X | 96.97 | 89.82 | 44.83 | 125 | 15492 |
| F1520 | Haikou, Hainan   | Male   | 31 | Chest            | Tinea corporis | Illumina HiSeq X | 97.01 | 93.25 | 43.51 | 122 | 15774 |
| F1521 | Fuyang, Anhui    | Female | 19 | Groin            | Tinea cruris   | Illumina HiSeq X | 96.47 | 89.72 | 46.2  | 124 | 15250 |
| F1522 | Haikou, Hainan   | Male   | 25 | Groin            | Tinea cruris   | Illumina HiSeq X | 97.29 | 90.02 | 46.14 | 138 | 15710 |
| F1720 | Wenchang, Hainan | Female | 19 | Face             | Tinea faciei   | Illumina HiSeq X | 97.59 | 93.01 | 44.37 | 145 | 15842 |
| F1722 | Shiyan, Hubei    | Male   | 10 | Between the toes | Tinea pedis    | Illumina HiSeq X | 96.95 | 92.86 | 45.44 | 162 | 14797 |
| F1732 | Shiyan, Hubei    | Male   | 41 | Toenail          | Onychomycosis  | Illumina HiSeq X | 96.62 | 93.05 | 45.8  | 147 | 14211 |
| F1752 | Wenchang, Hainan | Male   | 18 | Buttock          | Tinea cruris   | Illumina HiSeq X | 97.55 | 89.78 | 43.94 | 134 | 15753 |
| F2200 | Lingshui, Hainan | Male   | 16 | Buttock          | Tinea cruris   | Illumina HiSeq X | 97.03 | 93.72 | 44.04 | 124 | 15662 |
| F2230 | Lingshui, Hainan | Female | 48 | Groin            | Tinea cruris   | Illumina HiSeq X | 97.05 | 93.23 | 43.24 | 135 | 15769 |
| F2267 | Lingshui, Hainan | Male   | 33 | Waist            | Tinea corporis | Illumina HiSeq X | 97.02 | 92.37 | 43.9  | 145 | 15803 |
| F2288 | Wenchang, Hainan | Male   | 53 | Buttock          | Tinea cruris   | Illumina HiSeq X | 97.47 | 93.58 | 43.91 | 133 | 15672 |
| F2298 | Wenchang, Hainan | Male   | 67 | Abdomen          | Tinea corporis | Illumina HiSeq X | 97.56 | 90.93 | 45.92 | 118 | 15477 |
| F2306 | Lingshui, Hainan | Male   | 30 | Waist            | Tinea corporis | Illumina HiSeq X | 96.56 | 93.61 | 46.23 | 139 | 14495 |
| F2308 | Lingshui, Hainan | Male   | 31 | Face             | Tinea faciei   | Illumina HiSeq X | 96.58 | 93.83 | 46.81 | 147 | 13628 |
| F2322 | Lingshui, Hainan | Male   | 13 | Groin            | Tinea cruris   | Illumina HiSeq X | 96.37 | 93.67 | 44.64 | 148 | 15553 |
| F2342 | Lingshui, Hainan | Male   | 15 | Abdomen          | Tinea corporis | Illumina HiSeq X | 97.19 | 93.64 | 44.01 | 128 | 15432 |
| F2406 | Lingshui, Hainan | Male   | 21 | Groin            | Tinea cruris   | Illumina HiSeq X | 97.16 | 90.04 | 41.7  | 106 | 15424 |
| F2410 | Lingshui, Hainan | Male   | 37 | Thigh            | Tinea corporis | Illumina HiSeq X | 96.4  | 93.56 | 45.11 | 127 | 15016 |

|       |                    |        |          |                  |                |                  |       |       |       |     |       |
|-------|--------------------|--------|----------|------------------|----------------|------------------|-------|-------|-------|-----|-------|
| F2414 | Wenchang, Hainan   | Male   | 18       | Buttock          | Tinea cruris   | Illumina HiSeq X | 97.52 | 93.5  | 44.43 | 145 | 15527 |
| F2416 | Lingshui, Hainan   | Female | 21       | Buttock          | Tinea cruris   | Illumina HiSeq X | 96.54 | 93.45 | 44.65 | 150 | 15340 |
| F2430 | Lingshui, Hainan   | Male   | 50       | Arm              | Tinea corporis | Illumina HiSeq X | 96.38 | 93.53 | 44.7  | 114 | 15006 |
| F2452 | Lingshui, Hainan   | Male   | 38       | Groin            | Tinea cruris   | Illumina HiSeq X | 96.47 | 93.77 | 45.92 | 166 | 14996 |
| F2704 | Changzhou, Jiangsu | Male   | 54       | Groin            | Tinea cruris   | Illumina HiSeq X | 96.92 | 93.56 | 44.63 | 144 | 15070 |
| F2706 | Changzhou, Jiangsu | Male   | 67       | Fingertips       | Tinea mannum   | Illumina HiSeq X | 96.67 | 93.52 | 43.18 | 126 | 15787 |
| F2758 | Changzhou, Jiangsu | Female | 26       | Groin            | Tinea cruris   | Illumina HiSeq X | 96.96 | 93.59 | 43.71 | 130 | 15473 |
| F2768 | Fuyang, Anhui      | Male   | 24       | Groin            | Tinea cruris   | Illumina HiSeq X | 96.58 | 93.52 | 44.05 | 143 | 15506 |
| F2772 | Fuyang, Anhui      | Female | 28       | Buttock          | Tinea cruris   | Illumina HiSeq X | 96.33 | 90.13 | 46.56 | 110 | 15058 |
| F2966 | Lingshui, Hainan   | Male   | 28       | Upper limb       | Tinea corporis | Illumina HiSeq X | 96.35 | 93.24 | 44.6  | 145 | 14702 |
| F4174 | Changzhou, Jiangsu | Male   | 45       | Buttock          | Tinea cruris   | Illumina HiSeq X | 97.1  | 91.58 | 44.32 | 114 | 14699 |
| F4284 | Jinhua, Zhejiang   | Male   | 31       | Buttock          | Tinea cruris   | Illumina HiSeq X | 97.12 | 92.99 | 44.39 | 116 | 15375 |
| F4290 | Wuhan, Hubei       | Female | 9 months | Upper right arm  | Tinea corporis | Illumina HiSeq X | 96.95 | 92.79 | 43.72 | 119 | 15511 |
| F4292 | Wuhan, Hubei       | Female | 35       | Foot             | Tinea pedis    | Illumina HiSeq X | 96.79 | 91.92 | 44.29 | 105 | 15572 |
| F4300 | Wuhan, Hubei       | Female | 29       | Sole             | Tinea pedis    | Illumina HiSeq X | 96.83 | 92.15 | 45.65 | 127 | 15216 |
| F4306 | Wuhan, Hubei       | Female | 28       | Lower limb       | Tinea corporis | Illumina HiSeq X | 97.18 | 92.09 | 43.56 | 130 | 15490 |
| F4308 | Wuhan, Hubei       | Female | 27       | Foot             | Tinea pedis    | Illumina HiSeq X | 95.81 | 92.53 | 45.88 | 130 | 14192 |
| F4310 | Wuhan, Hubei       | Female | 34       | Toenail          | Onychomycosis  | Illumina HiSeq X | 96.84 | 91.72 | 44.31 | 114 | 15126 |
| F4316 | Wuhan, Hubei       | Female | 30       | Between the toes | Tinea pedis    | Illumina HiSeq X | 96.55 | 90.25 | 45.81 | 124 | 15381 |
| F4318 | Wuhan, Hubei       | Female | 27       | Between the toes | Tinea pedis    | Illumina HiSeq X | 97.16 | 91.76 | 46.31 | 134 | 14983 |
| F4320 | Wuhan, Hubei       | Female | 20       | Groin            | Tinea cruris   | Illumina HiSeq X | 96.76 | 92.34 | 43.52 | 95  | 15428 |
| F4322 | Wuhan, Hubei       | Female | 27       | Front chest      | Tinea corporis | Illumina HiSeq X | 96.48 | 90.58 | 47.21 | 132 | 12885 |
| F4324 | Wuhan, Hubei       | Female | 37       | Between the toes | Tinea pedis    | Illumina HiSeq X | 96.66 | 92.71 | 45.14 | 142 | 14810 |
| F4326 | Wuhan, Hubei       | Male   | 11       | Groin            | Tinea cruris   | Illumina HiSeq X | 96.19 | 92.63 | 45.41 | 146 | 14666 |
| F4330 | Wuhan, Hubei       | Male   | 30       | Lower limb       | Tinea corporis | Illumina HiSeq X | 96.5  | 92.25 | 45.21 | 116 | 15096 |
| F4332 | Wuhan, Hubei       | Female | 39       | Toenail          | Onychomycosis  | Illumina HiSeq X | 96.53 | 90.67 | 46.32 | 135 | 14558 |
| F4340 | Wuhan, Hubei       | Male   | 27       | Between the toes | Tinea pedis    | Illumina HiSeq X | 96.08 | 93.08 | 44.42 | 80  | 12910 |
| F4344 | Wuhan, Hubei       | Female | 30       | Groin            | Tinea cruris   | Illumina HiSeq X | 96.86 | 88.97 | 46.24 | 128 | 14164 |
| F4346 | Wuhan, Hubei       | Female | 2 months | Groin            | Tinea cruris   | Illumina HiSeq X | 96.28 | 93.03 | 44.05 | 116 | 15012 |
| F4348 | Wuhan, Hubei       | Male   | 29       | Groin            | Tinea cruris   | Illumina HiSeq X | 96.24 | 92.39 | 43.45 | 126 | 15266 |
| F4350 | Wuhan, Hubei       | Female | 30       | Between the toes | Tinea pedis    | Illumina HiSeq X | 96.19 | 92.33 | 43.76 | 143 | 15464 |
| F4353 | Wuhan, Hubei       | Female | 34       | Groin            | Tinea cruris   | Illumina HiSeq X | 96.57 | 92.52 | 45.58 | 173 | 15711 |
| F4356 | Wuhan, Hubei       | Female | 1.6      | Between the toes | Tinea pedis    | Illumina HiSeq X | 96.66 | 91.85 | 44.97 | 139 | 15533 |
| F4358 | Wuhan, Hubei       | Female | 29       | Between the toes | Tinea pedis    | Illumina HiSeq X | 96.59 | 91.86 | 46.78 | 124 | 12843 |
| F4364 | Wuhan, Hubei       | Male   | 2        | Toenail          | Onychomycosis  | Illumina HiSeq X | 96.57 | 92.29 | 45.36 | 157 | 14953 |
| F4366 | Wuhan, Hubei       | Female | 34       | Groin            | Tinea cruris   | Illumina HiSeq X | 95.97 | 92.32 | 45.89 | 171 | 14644 |
| F4368 | Wuhan, Hubei       | Female | 29       | Groin            | Tinea cruris   | Illumina HiSeq X | 96.55 | 92.22 | 45.51 | 143 | 14863 |
| F4370 | Wuhan, Hubei       | Male   | 27       | Groin            | Tinea cruris   | Illumina HiSeq X | 96.12 | 92.72 | 46.27 | 150 | 14347 |

|       |                   |        |           |                  |                |                  |       |       |       |     |       |
|-------|-------------------|--------|-----------|------------------|----------------|------------------|-------|-------|-------|-----|-------|
| F4372 | Wuhan, Hubei      | Male   | 44        | Groin            | Tinea cruris   | Illumina HiSeq X | 96.37 | 91.2  | 46.69 | 124 | 11468 |
| F4374 | Wuhan, Hubei      | Male   | 29        | Groin            | Tinea cruris   | Illumina HiSeq X | 96.39 | 92.4  | 45.54 | 138 | 14192 |
| F4376 | Wuhan, Hubei      | Female | 27        | Foot             | Tinea pedis    | Illumina HiSeq X | 96.72 | 91.87 | 45.33 | 140 | 14915 |
| F4377 | Wuhan, Hubei      | Female | 27        | Foot             | Tinea pedis    | Illumina HiSeq X | 96.28 | 92.76 | 47.58 | 150 | 10204 |
| F4378 | Wuhan, Hubei      | Female | 27        | Between the toes | Tinea pedis    | Illumina HiSeq X | 96.77 | 92.07 | 46.93 | 133 | 12797 |
| F4382 | Wuhan, Hubei      | Female | 32        | Groin            | Tinea cruris   | Illumina HiSeq X | 96.44 | 91.91 | 45.14 | 149 | 15591 |
| F4384 | Wuhan, Hubei      | Female | 27        | Groin            | Tinea cruris   | Illumina HiSeq X | 96.61 | 92.14 | 45.06 | 140 | 15428 |
| F4838 | Fuyang, Anhui     | Female | 35        | Groin            | Tinea cruris   | Illumina HiSeq X | 96.42 | 91.47 | 45.29 | 133 | 15073 |
| F4840 | Wuhan, Hubei      | Female | 32        | Toenail          | Onychomycosis  | Illumina HiSeq X | 96.35 | 91.83 | 46.39 | 145 | 13666 |
| F4888 | Fuyang, Anhui     | Male   | 38        | Foot             | Tinea pedis    | Illumina HiSeq X | 96.16 | 91.91 | 46.16 | 143 | 14041 |
| F4890 | Fuyang, Anhui     | Male   | 54        | Hand             | Tinea mannum   | Illumina HiSeq X | 96.22 | 91.51 | 45.84 | 136 | 14541 |
| F4910 | Wuhan, Hubei      | Female | 2         | Foot             | Tinea pedis    | Illumina HiSeq X | 95.91 | 92.35 | 45.87 | 108 | 14979 |
| F4912 | Wuhan, Hubei      | Female | 10 month: | Popliteal        | Tinea corporis | Illumina HiSeq X | 96.78 | 91.65 | 44.57 | 140 | 15305 |
| F4914 | Wuhan, Hubei      | Female | 4         | Scalp            | Tinea capitis  | Illumina HiSeq X | 96.75 | 91.78 | 46.3  | 123 | 15213 |
| F4920 | Fuyang, Anhui     | Male   | 18        | Groin            | Tinea cruris   | Illumina HiSeq X | 96.31 | 91.56 | 44.62 | 152 | 15390 |
| F4926 | Wuhan, Hubei      | Female | 35        | Groin            | Tinea cruris   | Illumina HiSeq X | 97.17 | 91.95 | 47.18 | 145 | 11261 |
| F4928 | Fuyang, Anhui     | Male   | 15        | Groin            | Tinea cruris   | Illumina HiSeq X | 96.5  | 92.32 | 46.56 | 154 | 13037 |
| F4932 | Yinchuan, Ningxia | Female | 25        | Abdomen          | Tinea corporis | Illumina HiSeq X | 97.03 | 91.96 | 45.23 | 143 | 14843 |
| F4934 | Yinchuan, Ningxia | Male   | 35        | Abdomen          | Tinea corporis | Illumina HiSeq X | 97.13 | 92.11 | 44.94 | 151 | 15140 |
| F4936 | Yinchuan, Ningxia | Male   | 23        | Groin            | Tinea cruris   | Illumina HiSeq X | 97.11 | 91.08 | 46.1  | 135 | 13494 |
| F4948 | Fuyang, Anhui     | Male   | 12        | Fingernail       | Onychomycosis  | Illumina HiSeq X | 96.16 | 91.98 | 45.46 | 164 | 14920 |
| F4954 | Fuyang, Anhui     | Male   | 56        | Foot             | Tinea pedis    | Illumina HiSeq X | 96.16 | 91.31 | 45.75 | 143 | 14065 |
| F4956 | Fuyang, Anhui     | Female | 20        | Foot             | Tinea pedis    | Illumina HiSeq X | 96.55 | 91.38 | 45.64 | 155 | 14852 |
| F4958 | Fuyang, Anhui     | Male   | 28        | Thumb            | Tinea mannum   | Illumina HiSeq X | 96.56 | 91.91 | 45.91 | 143 | 14794 |
| F4960 | Fuyang, Anhui     | Female | 45        | Foot             | Tinea pedis    | Illumina HiSeq X | 96.45 | 92.31 | 46.25 | 147 | 14800 |
| F4962 | Fuyang, Anhui     | Female | 27        | Buttock          | Tinea cruris   | Illumina HiSeq X | 96.5  | 91.55 | 46.71 | 163 | 14186 |
| F4966 | Fuyang, Anhui     | Male   | 16        | Upper left arm   | Tinea corporis | Illumina HiSeq X | 96.41 | 92.29 | 47.04 | 193 | 11170 |
| F4970 | Fuyang, Anhui     | Female | 18        | Calf             | Tinea corporis | Illumina HiSeq X | 96.84 | 91.9  | 44.41 | 127 | 15124 |
| F4972 | Fuyang, Anhui     | Female | 34        | Groin            | Tinea cruris   | Illumina HiSeq X | 96.45 | 92.1  | 45.62 | 153 | 13894 |
| F4974 | Luzhou, Sichuan   | Male   | 19        | Buttock          | Tinea cruris   | Illumina HiSeq X | 96.95 | 91.94 | 44.87 | 153 | 15236 |
| F4976 | Luzhou, Sichuan   | Male   | 27        | Groin            | Tinea cruris   | Illumina HiSeq X | 96.81 | 91.01 | 46.65 | 146 | 13541 |
| F4978 | Luzhou, Sichuan   | Male   | 17        | Between the toes | Tinea pedis    | Illumina HiSeq X | 97.17 | 92.39 | 45.28 | 142 | 14981 |
| F4984 | Luzhou, Sichuan   | Male   | 38        | Thigh            | Tinea corporis | Illumina HiSeq X | 96.94 | 92.29 | 45.55 | 120 | 13244 |
| F4988 | Luzhou, Sichuan   | Female | 45        | Groin            | Tinea cruris   | Illumina HiSeq X | 96.72 | 92.94 | 45.04 | 167 | 14827 |
| F4994 | Haikou, Hainan    | Male   | 18        | Groin            | Tinea cruris   | Illumina HiSeq X | 96.97 | 92    | 46.49 | 140 | 12402 |
| F4996 | Fuyang, Anhui     | Female | 22        | Groin            | Tinea cruris   | Illumina HiSeq X | 96.26 | 92.25 | 45.72 | 136 | 14706 |
| F4998 | Haikou, Hainan    | Male   | 18        | Buttock          | Tinea cruris   | Illumina HiSeq X | 96.42 | 92.11 | 45.68 | 127 | 14657 |
| F5076 | Fuyang, Anhui     | Male   | 17        | Groin            | Tinea cruris   | Illumina HiSeq X | 96.66 | 92.36 | 43.85 | 124 | 15067 |

|       |                 |        |    |                  |                |                  |       |       |       |     |       |
|-------|-----------------|--------|----|------------------|----------------|------------------|-------|-------|-------|-----|-------|
| F5090 | Luzhou, Sichuan | Male   | 55 | Neck             | Tinea corporis | Illumina HiSeq X | 97.19 | 92.35 | 46.03 | 136 | 14039 |
| F5098 | Luzhou, Sichuan | Male   | 45 | Groin            | Tinea cruris   | Illumina HiSeq X | 96.91 | 92.38 | 43.98 | 128 | 15319 |
| F5102 | Haikou, Hainan  | Male   | 78 | Neck             | Tinea corporis | Illumina HiSeq X | 97.22 | 92.36 | 45.18 | 132 | 15445 |
| F5104 | Haikou, Hainan  | Male   | 54 | Groin            | Tinea corporis | Illumina HiSeq X | 97.09 | 92.15 | 46.08 | 140 | 13325 |
| F5108 | Haikou, Hainan  | Male   | 21 | Buttock          | Tinea cruris   | Illumina HiSeq X | 96.71 | 92.4  | 45.29 | 137 | 15469 |
| F5110 | Haikou, Hainan  | Male   | 14 | Groin            | Tinea cruris   | Illumina HiSeq X | 96.76 | 92.44 | 46.43 | 148 | 13079 |
| F5118 | Haikou, Hainan  | Male   | 33 | Groin            | Tinea cruris   | Illumina HiSeq X | 97.4  | 92.15 | 46.32 | 117 | 12034 |
| F5124 | Haikou, Hainan  | Male   | 18 | Buttock          | Tinea cruris   | Illumina HiSeq X | 97.8  | 91.78 | 45.85 | 157 | 15127 |
| F5132 | Fuyang, Anhui   | Female | 30 | Buttock          | Tinea cruris   | Illumina HiSeq X | 96.38 | 92.5  | 47.85 | 166 | 12005 |
| F5138 | Luzhou, Sichuan | Male   | 27 | Between the toes | Tinea pedis    | Illumina HiSeq X | 97.03 | 92.04 | 47.43 | 177 | 10534 |
| F5174 | Haikou, Hainan  | Male   | 25 | Groin            | Tinea cruris   | Illumina HiSeq X | 97.14 | 91.46 | 45.39 | 118 | 15317 |
| F5178 | Haikou, Hainan  | Male   | 22 | Groin            | Tinea cruris   | Illumina HiSeq X | 97.23 | 92.46 | 44.79 | 129 | 15212 |
| F5194 | Haikou, Hainan  | Female | 21 | Chest            | Tinea corporis | Illumina HiSeq X | 97.09 | 92.05 | 44.57 | 131 | 15664 |
| F5274 | Ledong, Hainan  | Male   | 41 | Upper right arm  | Tinea corporis | Illumina HiSeq X | 97.17 | 92.29 | 44.91 | 139 | 15457 |
| F5294 | Shiyan, Hubei   | Female | 65 | Buttock          | Tinea cruris   | Illumina HiSeq X | 96.5  | 92.34 | 45.36 | 161 | 15378 |

Supplementary Data 1 (related to Figure 2, 3 and 4): *T. rubrum* genome sequencing summary: information of strain ID, isolation site, clinical manifestations (patient gender, age, localization of lesions, clinical diagnosis), sequencing technology, Q20, Q30, GC content, sequencing depth and total number of SNPs.
